# Supplementary material for: A GID E3 ligase assembly ubiquitinates an Rsp5 E3 adaptor and regulates plasma membrane transporters
Source: PubMed Central journal article supplement — EMBO Rep. 2022 Apr 19;23(6):e53835. doi: 10.15252/embr.202153835 (PMC9171410; doi:10.15252/embr.202153835), 2022-04-19
Supplement: EMBR-23-e53835-s001.pdf [file EMBR-23-e53835-s001.pdf]

**Table EV1: Crystallography data collection and refinement statistics****Data Collection**

|                             |                                                |
|-----------------------------|------------------------------------------------|
| Space group                 | P 2 <sub>1</sub> 2 <sub>1</sub> 2 <sub>1</sub> |
| Cell dimensions             |                                                |
| a, b, c (Å)                 | 40.52 67.82 75.49                              |
| $\alpha, \beta, \gamma$ (°) | 90 90 90                                       |
| Resolution range (Å)        | 40.52 - 1.26                                   |
| $I / \sigma(I)$             | 26.12 (1.62)                                   |
| Completeness (%)            | 99.2 (95.6)                                    |

**Refinement**

|                                       |                            |
|---------------------------------------|----------------------------|
| Refinement program                    | phenix.refine 1.19.2_4158  |
| Resolution (Å)                        | 31.59 - 1.26 (1.31 - 1.26) |
| R <sub>work</sub> / R <sub>free</sub> | 0.19/0.225                 |
| Reflections used in refinement        | 56848 (5585)               |
| Reflections used for R-free           | 2846 (280)                 |
| No. of molecules in ASU               | 1                          |
| Total no. of atoms                    | 2072                       |
| Protein                               | 1789                       |
| Peptide                               | 65                         |
| Ligand                                | 1                          |
| Water                                 | 217                        |
| Wilson B-factor (Å <sup>2</sup> )     | 18.7                       |
| RMSD bond length (Å)                  | 0.006                      |
| RMSD bond angle (°)                   | 0.98                       |
| Ramachandran favored (%)              | 97.22                      |
| Ramachandran allowed (%)              | 2.78                       |
| Ramachandran outliers (%)             | 0.00                       |

Values for the highest-resolution shell are given in parentheses.
