# Supplementary material for: A GID E3 ligase assembly ubiquitinates an Rsp5 E3 adaptor and regulates plasma membrane transporters
Source: PubMed Central journal article supplement — EMBO Rep. 2022 Apr 19;23(6):e53835. doi: 10.15252/embr.202153835 (PMC9171410; doi:10.15252/embr.202153835), 2022-04-19
Supplement: EMBR-23-e53835-s003.pdf [file EMBR-23-e53835-s003.pdf]

## Expanded View Figures

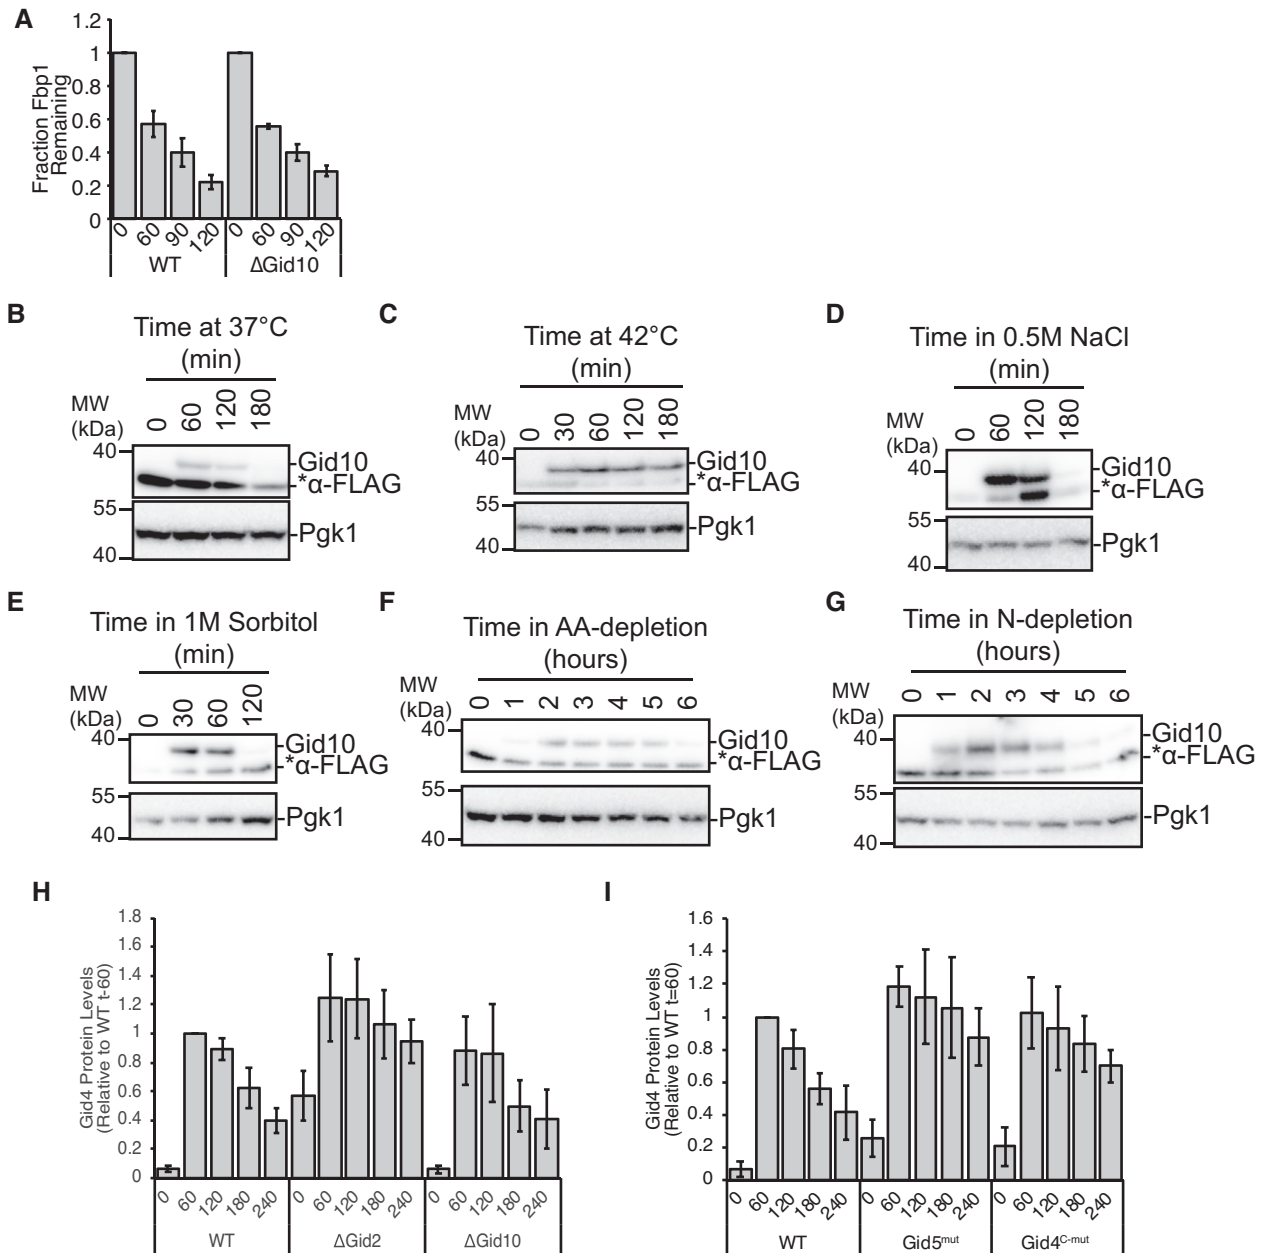

Figure EV1.

**Figure EV1. Regulation of Gid10 and Gid4 expression.**

- A Tetracycline reference-based chase performed during transition from ethanol to glucose media with wildtype and  $\Delta$ Gid10 strains. Bars represent mean, error bars represent standard deviation ( $n > 3$  biological replicates).
- B Lysates from a yeast strain expressing endogenously tagged 3xFLAG-Gid10 that was grown in YPD at 37°C for the indicated timepoints were run on an SDS-PAGE gel and immunoblotted with  $\alpha$ FLAG and  $\alpha$ PGK.
- C Lysates from a yeast strain expressing endogenously tagged 3xFLAG-Gid10 that was grown in YPD at 42°C for the indicated timepoints were run on an SDS-PAGE gel and immunoblotted with  $\alpha$ FLAG and  $\alpha$ PGK.
- D Lysates from a yeast strain expressing endogenously tagged 3xFLAG-Gid10 that was grown in YPD supplemented with 0.5 M NaCl for the indicated timepoints were run on an SDS-PAGE gel and immunoblotted with  $\alpha$ FLAG and  $\alpha$ PGK.
- E Lysates from a yeast strain expressing endogenously tagged 3xFLAG-Gid10 that was grown in SD complete supplemented with 1 M Sorbitol for the indicated timepoints were run on an SDS-PAGE gel and immunoblotted with  $\alpha$ FLAG and  $\alpha$ PGK.
- F Lysates from a yeast strain expressing endogenously tagged 3xFLAG-Gid10 that was grown in SD-AA for the indicated timepoints were run on an SDS-PAGE gel and immunoblotted with  $\alpha$ FLAG and  $\alpha$ PGK.
- G Lysates from a yeast strain expressing endogenously tagged 3xFLAG-Gid10 that was grown in SD-N for the indicated timepoints were run on an SDS-PAGE gel and immunoblotted with  $\alpha$ FLAG and  $\alpha$ PGK.
- H Wildtype,  $\Delta$ Gid2 and  $\Delta$ Gid10 yeast strains expressing endogenously tagged 3xFLAG-Gid4 were grown in YPE for 19 h and then shifted to YPD for the indicated timepoints. Lysates were run on an SDS-PAGE gel and immunoblotted with  $\alpha$ FLAG and  $\alpha$ PGK (as a reference control). Bars represent mean, error bars represent standard deviation ( $n > 3$  biological replicates).
- I Wildtype, Gid5<sup>W606A, Y613A, Q649A</sup> (mut), and Gid4<sup>F359A, F361A</sup> (c-mut) yeast strains expressing endogenously tagged 3xFLAG-Gid4 were grown in YPE for 19 h and then shifted to YPD for the indicated timepoints. Lysates were run on an SDS-PAGE gel and immunoblotted with  $\alpha$ FLAG and  $\alpha$ PGK (as a reference control). Bars represent mean, error bars represent standard deviation ( $n > 3$  biological replicates).

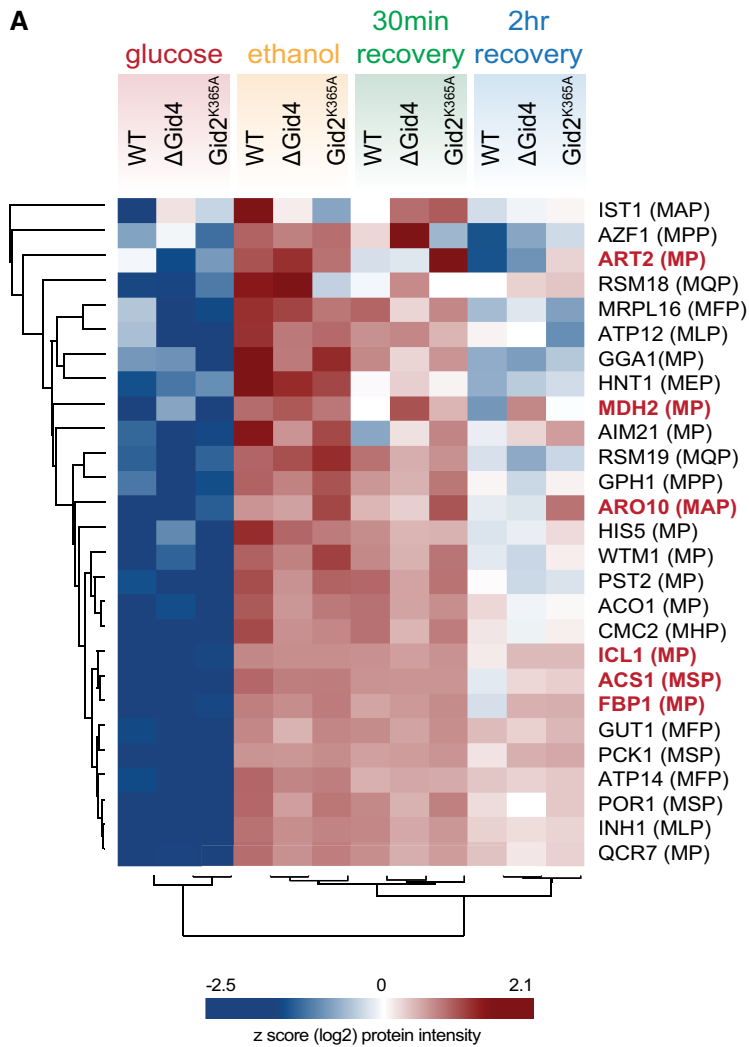

**Figure EV2. Protein expression during recovery from ethanol starvation.**

- A Heat map of z-scored abundances (log<sub>2</sub>) of the proteins which have the following criteria: (i) significantly upregulated in ethanol compared to glucose, (ii) significantly upregulated in ethanol compared to 2 h recovery, and (iii) contains a proline in position 2 or 3.
- B Art2 protein abundance in wildtype and Gid10 overexpressing yeast strains grown in ethanol medium (YPE) for 19 h, and following 30 min and 2 h glucose recovery. Bars represent mean, error bars represent standard deviation, significance was determined by one-way ANOVA (unpaired) followed by Tukey's multiple comparison test, \*\* indicates  $P < 0.01$  ( $n = 3$  biological replicates).

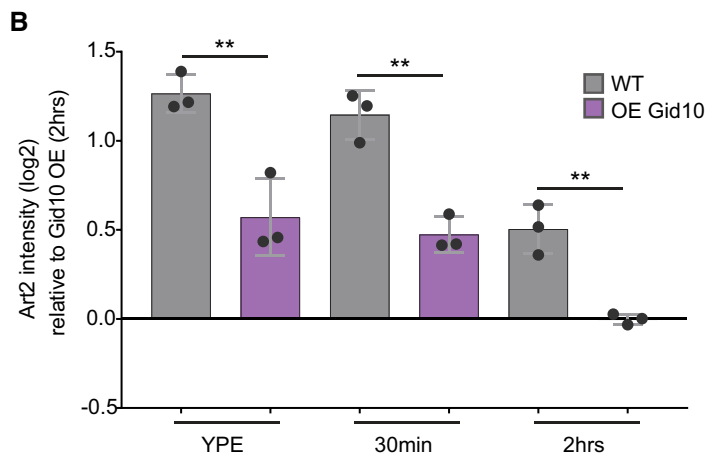

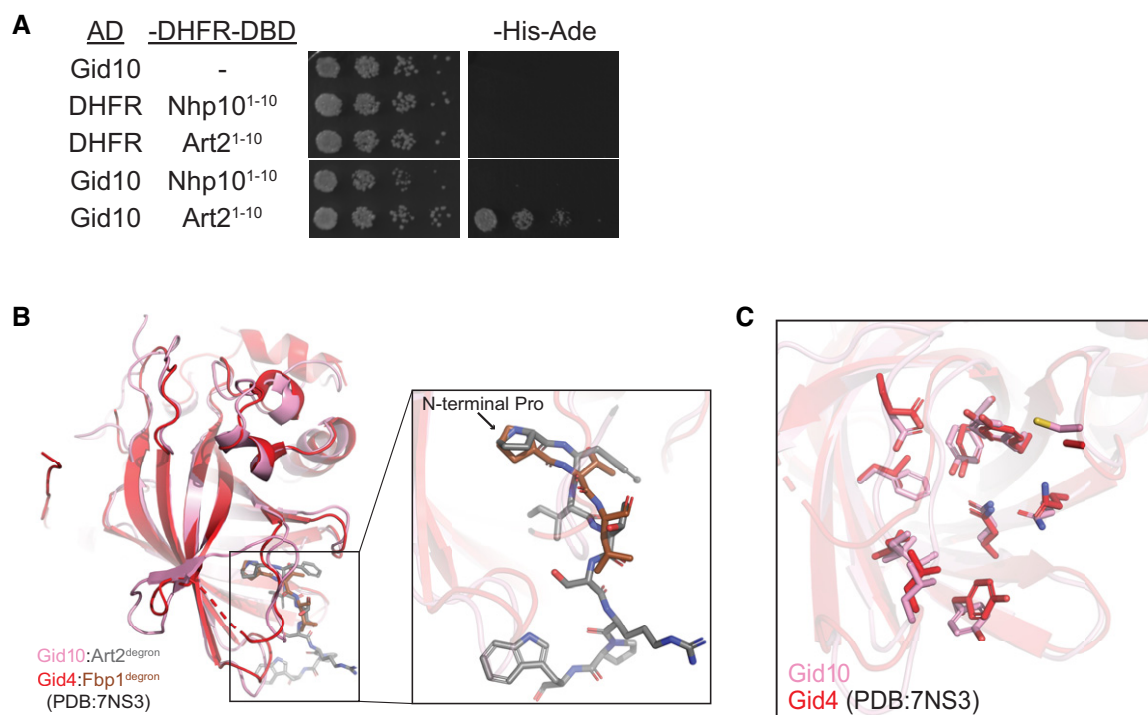

**Figure EV3. Gid10 interacts with the Art2 N-terminus.**

- A Yeast two-hybrid between SR-Gal4 activation domain (AD) and substrate degrons fused to DHFR-DNA binding domain (-DHFR-DBD). Growth on -His-Ade is indicative of an interaction between the two test proteins. Spots represent 1:5 serial dilutions.
- B Overlay of Gid10 (pink): Art2<sup>2-8</sup> (gray) and Gid4 (red): Fbp1<sup>2-4</sup> (brown) (extracted from PDB:7NS3) showing overall similarity of their substrate-binding domains as well as the trajectory of the bound degrons.
- C Overlay of Gid10 (pink) and Gid4 (red, extracted from PDB:7NS3) highlighting the residues inside their substrate-binding pockets (shown as sticks).

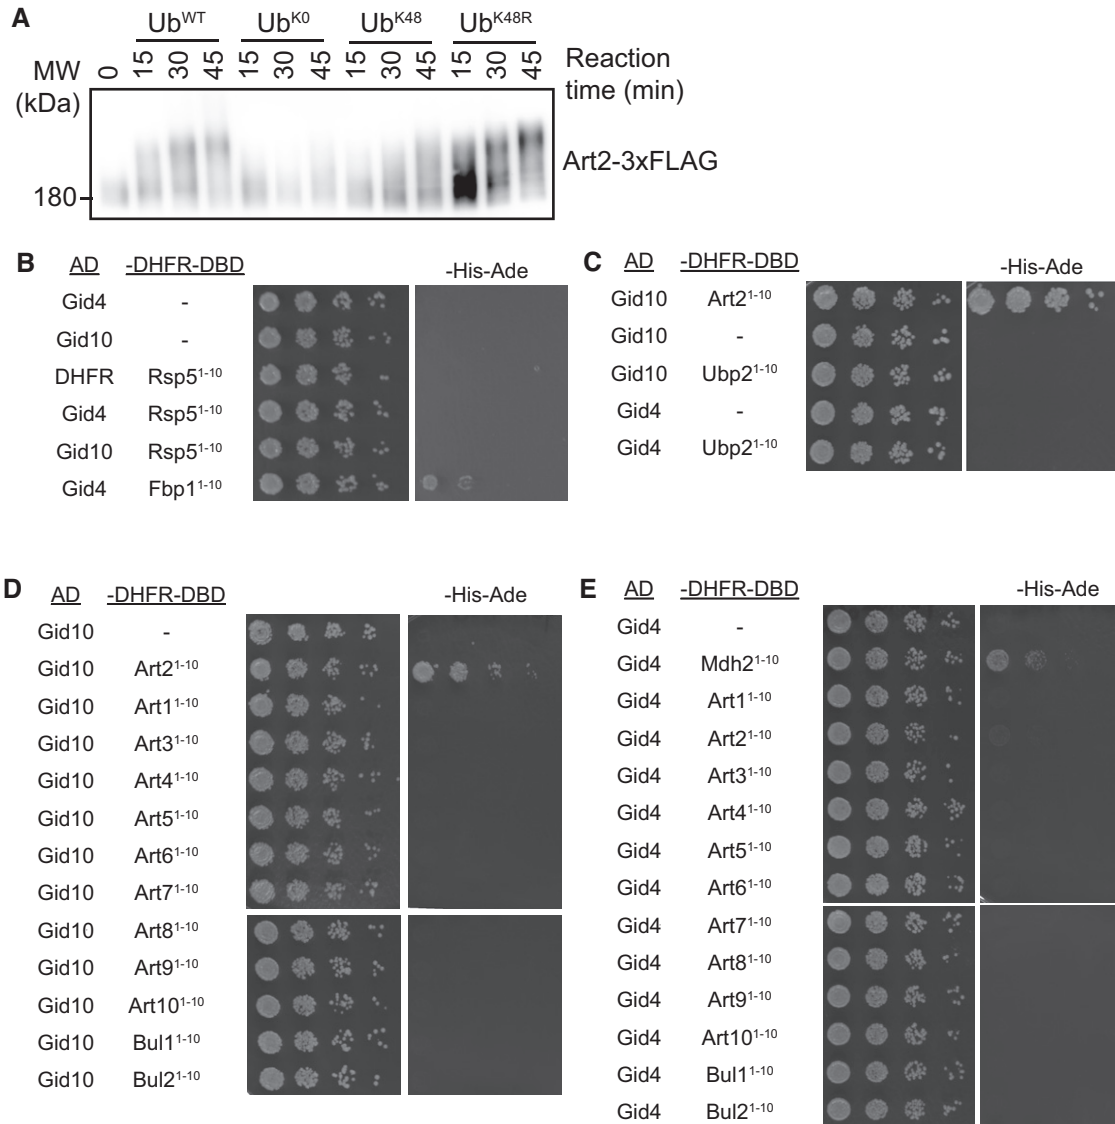

**Figure EV4. Gid10 and Gid4 do not interact broadly with arrestin degrons.**

- A Art2-3xFLAG was immunoprecipitated from yeast cells grown in YPD and incubated with Gid<sup>SR10</sup> and either wildtype ubiquitin, lysine-less ubiquitin (Ub<sup>K0</sup>), lysine-less ubiquitin containing only K48 (Ub<sup>K48</sup>), or ubiquitin containing a K48R point mutation (Ub<sup>K48R</sup>) for the indicated timepoints. Progress of the reaction was followed by  $\alpha$ FLAG immunoblot.
- B Yeast two-hybrid between SR-Gal4 activation domain (AD) and Rsp5 degron fused to DHFR-DNA binding domain (-DHFR-DBD). Interaction between Gid4-AD and Fbp1-DBD is shown as a control. Growth on -His-Ade is indicative of an interaction between the two test proteins. Spots represent 1:5 serial dilutions.
- C Yeast two-hybrid between SR-Gal4 activation domain (AD) and Ubp2 degron fused to DHFR-DNA binding domain (-DHFR-DBD). Interaction between Gid10-AD and Art2-DBD is shown as a control. Growth on -His-Ade is indicative of an interaction between the two test proteins. Spots represent 1:5 serial dilutions.
- D Yeast two-hybrid between Gid10-Gal4 activation domain (AD) and arrestin degrons fused to DHFR-DNA binding domain (-DHFR-DBD). Growth on -His-Ade is indicative of an interaction between the two test proteins. Spots represent 1:5 serial dilutions.
- E Yeast two-hybrid between Gid4-Gal4 activation domain (AD) and arrestin degrons fused to DHFR-DNA binding domain (-DHFR-DBD). Interaction between Gid4-AD and Mdh2-DBD is shown as a control. Growth on -His-Ade is indicative of an interaction between the two test proteins. Spots represent 1:5 serial dilutions.

**Figure EV5. Regulation of amino acid receptors during heat shock.**

- A Wildtype,  $\Delta$ Gid2 and  $\Delta$ Gid5 yeast strains expressing endogenously tagged Lyp1-GFP were grown at 42°C for the indicated timepoints. Lysates were run on an SDS-PAGE gel and immunoblotted with  $\alpha$ GFP and  $\alpha$ PGK.
- B Growth assay of wildtype,  $\Delta$ Art2,  $\Delta$ Art1,  $\Delta$ Art2 $\Delta$ Art1, and  $\Delta$ Art1 overexpressing Art2 yeast strains on SD-Lys (–) and SD-Lys containing 1.0  $\mu$ g/ml thialysine (+). Spots represent 1:5 serial dilutions.
- C Wildtype,  $\Delta$ Art2,  $\Delta$ Art1, and  $\Delta$ Art2 $\Delta$ Art1 yeast strains expressing endogenously tagged Lyp1-GFP were grown at 42°C for the indicated timepoints. Lysates were run on an SDS-PAGE gel and immunoblotted with  $\alpha$ GFP and  $\alpha$ PGK.
- D  $\Delta$ Art1 strains containing *GID2* or *GID5* deletions and expressing endogenously tagged Lyp1-GFP were grown at 42°C for the indicated timepoints. Lysates were run on an SDS-PAGE gel and immunoblotted for  $\alpha$ GFP and  $\alpha$ PGK.
- E Growth assay of wildtype and  $\Delta$ Art2 strains containing *GID2* or *GID5* deletions on SD-Lys (–) and SD-Lys containing 1.5  $\mu$ g/ml thialysine (+). Spots represent 1:2.6 serial dilutions.
- F  $\Delta$ Art1 strains containing a *GID5* deletion or a *GID5ART2* double deletion and expressing endogenously tagged Lyp1-GFP were grown at 42°C for the indicated timepoints. Lysates were run on an SDS-PAGE gel and immunoblotted for  $\alpha$ GFP and  $\alpha$ PGK.
- G  $\Delta$ Art1 strains containing an *ART2* deletion or a *GID5ART2* double deletion and expressing endogenously tagged Lyp1-GFP were grown at 42°C for the indicated timepoints. Lysates were run on an SDS-PAGE gel and immunoblotted for  $\alpha$ GFP and  $\alpha$ PGK.

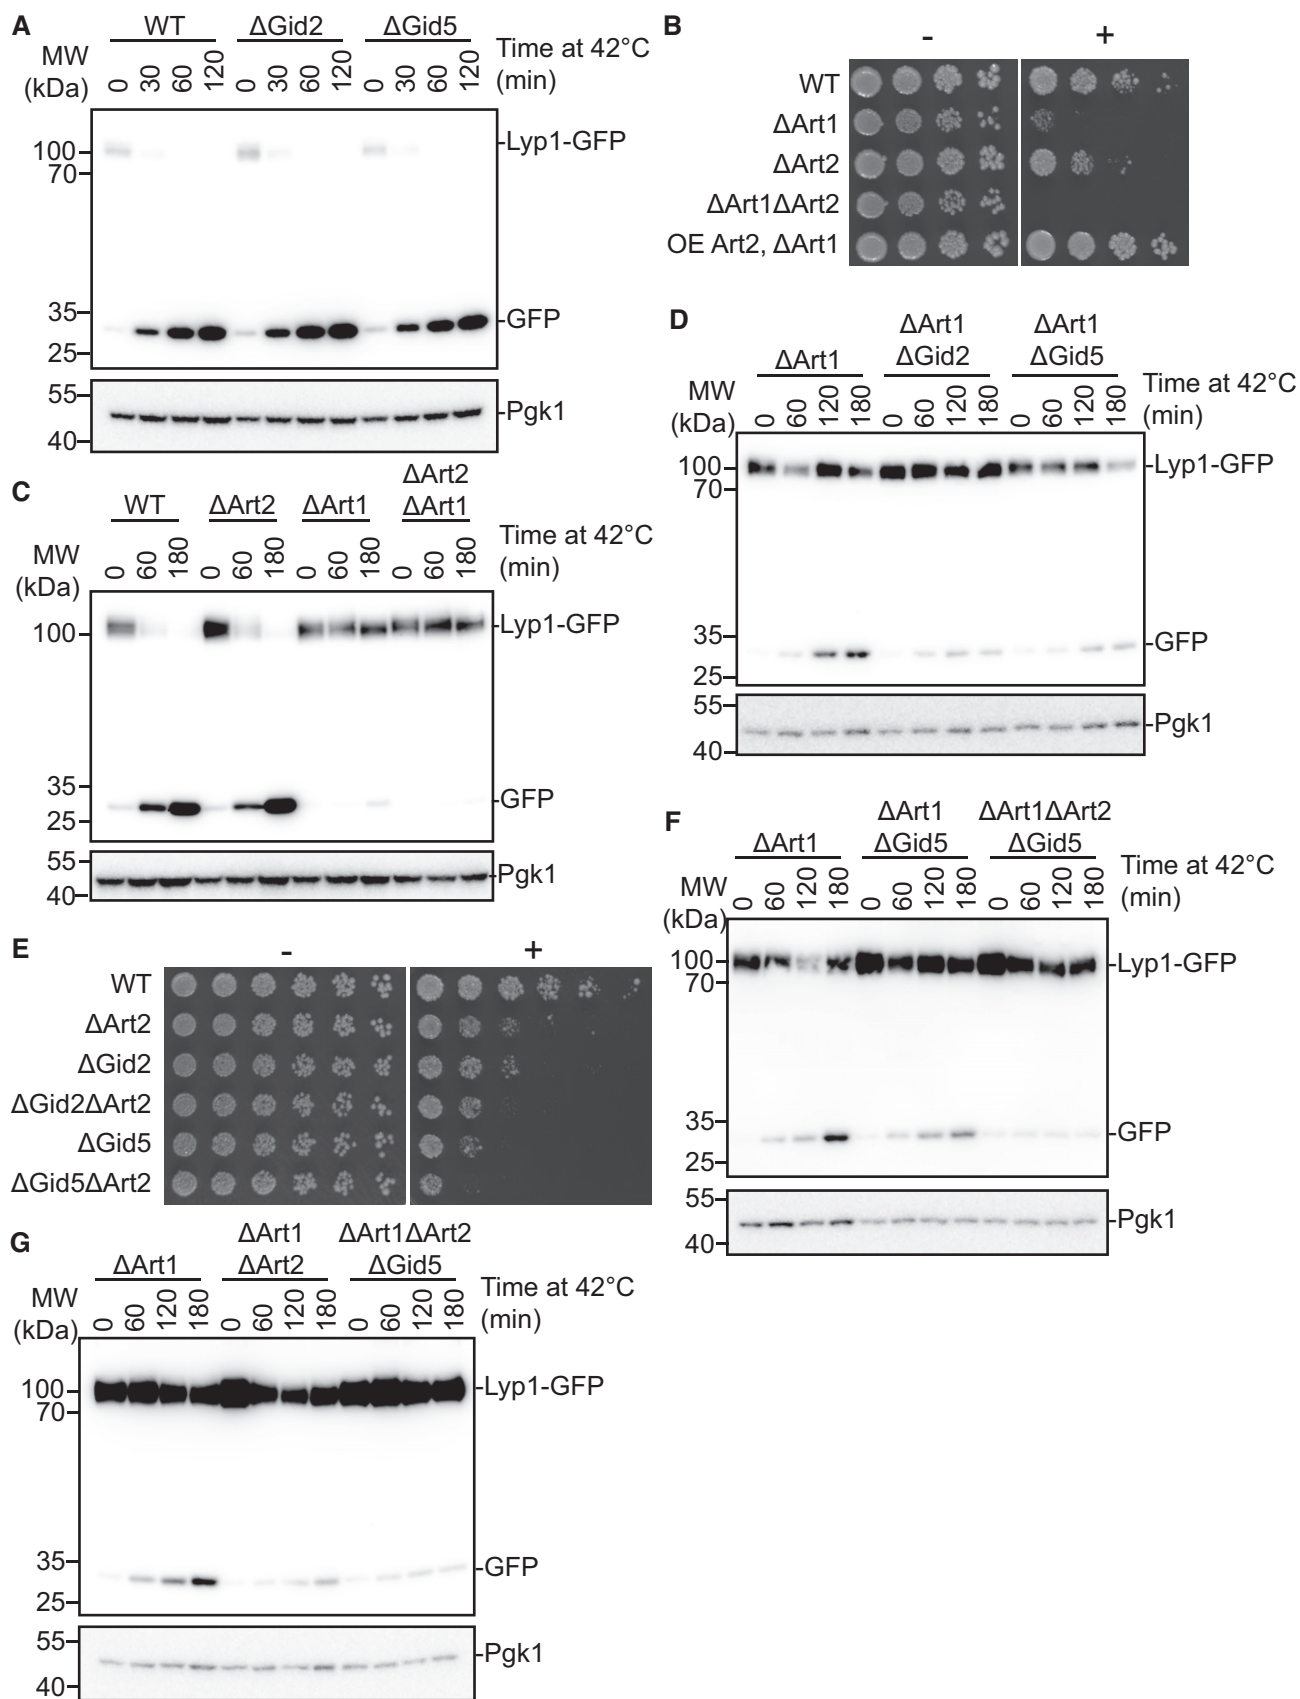

Figure EV5.
